# Supplementary material
Source: MDPI journal article supplement (https://www.mdpi.com/2311-7524/8/2/115)
Supplement: s1 [file s1]

Archive with 2 entries (2 files):
- Supplemental Tables_Horticulturae.pdf
- Supplementary Figure S1.pptx
